# Supplementary material
Source: PubMed Central journal article supplement (PMC3391153)
Supplement: supp_M111.279091_jbc.M111.279091-2.pdf [file supp_M111.279091_jbc.M111.279091-2.pdf]

Supplemental data

Figure S2

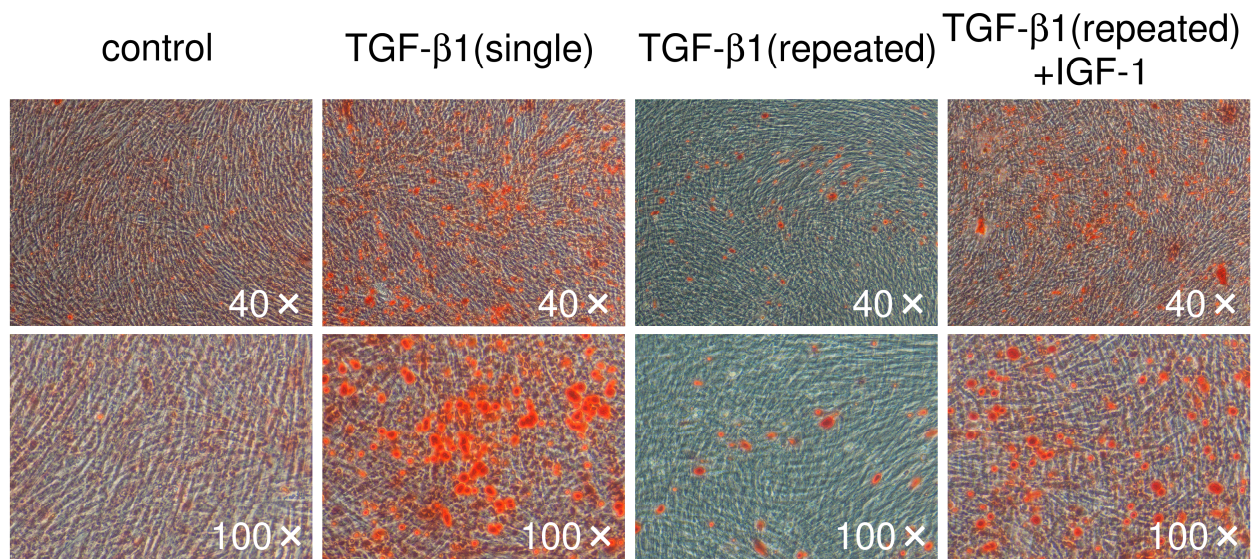

Figure S2.

Repeated TGF-β1 administration inhibits mineralization in HPDL cells. HPDL cells were seeded at a density of  $1 \times 10^5$  cells/cm<sup>2</sup>. HPDL cells were cultured in OBM in the presence of 5% FBS for 14 days with or without other factors as indicated. The concentration of each factor was as follows, TGF-β1 (1 ng/ml) and IGF-1 (200 ng/ml). The mineralized matrix was stained with alizarin red for calcium. Stained cells were photographed. A single TGF-β1 administration induced mineralization, while cells with repeated TGF-β1 administration revealed marked reduction of mineralization and was recovered by IGF-1 addition.
